# Supplementary material for: Fetal and organ development at gestational days 45, 90, 135 and at birth of lambs exposed to under- or over-nutrition during gestation,,
Source: PubMed Central journal article supplement — Transl Anim Sci. 2017 Feb 1;1(1):16–25. doi: 10.2527/tas2016.0002 (PMC7235467; doi:10.2527/tas2016.0002), 2017-02-01
Supplement: tas2017.0002-supplement1.pdf [file tas2017.0002-supplement1.pdf]

**Supplementary Table 1.** Interaction of maternal diet by day of gestation by litter size for offspring BW and perirenal fat

|                                 | Treatment <sup>1,2</sup> |                     |                    |                      |                     |                    |                     |                    |                     | SEM   | P-value |
|---------------------------------|--------------------------|---------------------|--------------------|----------------------|---------------------|--------------------|---------------------|--------------------|---------------------|-------|---------|
|                                 | CON                      |                     |                    | RES                  |                     |                    | OVER                |                    |                     |       |         |
|                                 | Singleton                | Twin                | Triplet            | Singleton            | Twin                | Triplet            | Singleton           | Twin               | Triplet             |       |         |
| BW, g                           |                          |                     |                    |                      |                     |                    |                     |                    |                     |       | 0.0011  |
| d 45                            | 10.55 <sup>a</sup>       | 11.82 <sup>a</sup>  | 9.80 <sup>a</sup>  | 11.93 <sup>a</sup>   | 9.05 <sup>a</sup>   | 10.53 <sup>a</sup> | 10.90 <sup>a</sup>  | 8.85 <sup>a</sup>  | 9.48 <sup>a</sup>   | 0.55  |         |
| d 90                            | 585 <sup>a</sup>         | 608 <sup>a</sup>    | 607 <sup>a</sup>   | 530 <sup>a</sup>     | 626 <sup>a</sup>    | 603 <sup>a</sup>   | 607 <sup>a</sup>    | 611 <sup>a</sup>   | 657 <sup>a</sup>    | 23    |         |
| d 135                           | 4,535 <sup>abc</sup>     | 5,267 <sup>cd</sup> | 3,793 <sup>a</sup> | 4,540 <sup>abc</sup> | 4,264 <sup>ab</sup> | 5,498 <sup>d</sup> | 5,072 <sup>cd</sup> | 4,497 <sup>b</sup> | -                   | 213   |         |
| Birth                           | 7,257 <sup>a</sup>       | 4,944 <sup>b</sup>  | 3,883 <sup>c</sup> | -                    | 4,197 <sup>cf</sup> | 2,365 <sup>d</sup> | 5,805 <sup>e</sup>  | 4,438 <sup>f</sup> | 4,233 <sup>cf</sup> | 234   |         |
| Perirenal fat, <sup>3%</sup> BW |                          |                     |                    |                      |                     |                    |                     |                    |                     |       | 0.0180  |
| d 45                            | nd <sup>4</sup>          | nd                  | nd                 | nd                   | nd                  | nd                 | nd                  | nd                 | nd                  | nd    |         |
| d 90                            | 0.28 <sup>a</sup>        | 0.52 <sup>a</sup>   | 0.41 <sup>a</sup>  | 0.37 <sup>a</sup>    | 0.42 <sup>a</sup>   | 0.41 <sup>a</sup>  | 0.45 <sup>a</sup>   | 0.42 <sup>a</sup>  | 0.49 <sup>a</sup>   | 0.079 |         |
| d 135                           | 0.42 <sup>ab</sup>       | 0.43 <sup>ab</sup>  | 0.41 <sup>ab</sup> | 0.46 <sup>ab</sup>   | 0.46 <sup>ab</sup>  | 0.28 <sup>a</sup>  | 0.58 <sup>b</sup>   | 0.57 <sup>b</sup>  | -                   | 0.082 |         |
| Birth                           | 0.44 <sup>a</sup>        | 0.36 <sup>a</sup>   | 0.42 <sup>a</sup>  | -                    | 0.47 <sup>a</sup>   | 1.02 <sup>b</sup>  | 0.26 <sup>a</sup>   | 0.39 <sup>a</sup>  | 0.33 <sup>a</sup>   | 0.066 |         |

<sup>a-f</sup> Denotes mean differences for the maternal diet by litter size interaction, within a day of gestation ( $P \leq 0.05$ ).

<sup>1</sup> Offspring from ewes fed a control (100% NRC), restricted (60% NRC), or over-fed (140% NRC) diet are referred to as CON, RES and OVER, respectively. Ewe diet was based on the NRC TDN requirement for pregnant ewes bearing twins and began at d 30 of gestation. At d 45, 90 or 135 of gestation, ewes were euthanized a hysterectomy was performed to acquire the fetuses. Lambs were collected within 24 h of birth from ewes allowed to undergo parturition (n = 10 to 15 fetuses or lambs from 5 to 7 ewes per treatment combination).

<sup>2</sup> LSMeans are reported.

<sup>3</sup> Perirenal fat is expressed as a percent of offspring BW and reported as the combined weight of perirenal fat collected from around both kidneys.

<sup>4</sup> nd = not detectable.

**Supplementary Table 2.** Effect of maternal diet and day of gestation interaction on actual fetal organ weights

| Fetal variable <sup>1</sup>      | Treatment <sup>2,3</sup> |                    |                    | SEM  | P-value<br>Maternal diet by<br>day of gestation |
|----------------------------------|--------------------------|--------------------|--------------------|------|-------------------------------------------------|
|                                  | CON                      | RES                | OVER               |      |                                                 |
| Adrenal gland wt, <sup>4</sup> g |                          |                    |                    |      | 0.6759                                          |
| d 45                             | nd <sup>5</sup>          | nd                 | nd                 | nd   |                                                 |
| d 90                             | 0.17                     | 0.18               | 0.21               | 0.01 |                                                 |
| d 135                            | 0.58                     | 0.47               | 0.53               | 0.02 |                                                 |
| Birth                            | 0.96                     | 0.93               | 0.97               | 0.04 |                                                 |
| Heart wt, g                      |                          |                    |                    |      | 0.0303                                          |
| d 45                             | 0.11 <sup>a</sup>        | 0.12 <sup>a</sup>  | 0.12 <sup>a</sup>  | 0.01 |                                                 |
| d 90                             | 5.06 <sup>b</sup>        | 4.70 <sup>b</sup>  | 5.20 <sup>b</sup>  | 0.13 |                                                 |
| d 135                            | 33.38 <sup>de</sup>      | 25.18 <sup>c</sup> | 30.38 <sup>d</sup> | 1.22 |                                                 |
| Birth                            | 36.79 <sup>e</sup>       | 31.68 <sup>d</sup> | 36.57 <sup>e</sup> | 1.13 |                                                 |
| Kidney wt, <sup>6</sup> g        |                          |                    |                    |      | 0.0088                                          |

|                                  |                     |                     |                     |      |        |
|----------------------------------|---------------------|---------------------|---------------------|------|--------|
| d 45                             | 0.07 <sup>a</sup>   | 0.07 <sup>a</sup>   | 0.09 <sup>a</sup>   | 0.01 |        |
| d 90                             | 5.84 <sup>b</sup>   | 5.73 <sup>b</sup>   | 6.19 <sup>b</sup>   | 0.14 |        |
| d 135                            | 26.16 <sup>de</sup> | 21.11 <sup>c</sup>  | 27.48 <sup>e</sup>  | 0.87 |        |
| Birth                            | 27.95 <sup>e</sup>  | 23.13 <sup>dc</sup> | 25.28 <sup>de</sup> | 0.80 |        |
| Liver wt, g                      |                     |                     |                     |      |        |
| d 45                             | 0.76 <sup>a</sup>   | 0.78 <sup>a</sup>   | 0.60 <sup>a</sup>   | 0.03 | 0.0030 |
| d 90                             | 33.55 <sup>b</sup>  | 32.75 <sup>b</sup>  | 36.87 <sup>b</sup>  | 0.84 |        |
| d 135                            | 136.43 <sup>d</sup> | 91.04 <sup>c</sup>  | 129.95 <sup>d</sup> | 6.54 |        |
| Birth                            | 105.65 <sup>c</sup> | 92.68 <sup>c</sup>  | 103.84 <sup>c</sup> | 3.33 |        |
| Perirenal fat wt, <sup>7</sup> g |                     |                     |                     |      |        |
| d 45                             | nd                  | nd                  | nd                  | nd   | 0.1089 |
| d 90                             | 2.68                | 2.41                | 2.90                | 0.11 |        |
| d 135                            | 20.90               | 18.60               | 26.48               | 0.89 |        |
| Birth                            | 19.14               | 20.22               | 16.10               | 0.94 |        |

<sup>1</sup> Organ weights are expressed as actual weights.

<sup>2</sup> Offspring from ewes fed a control (100% NRC), restricted (60% NRC), or over-fed (140% NRC) diet are referred to as CON, RES and OVER, respectively. Ewe diet was based on the NRC TDN requirement for pregnant ewes bearing twins and began at d 30 of gestation. At d 45, 90 or 135 of gestation, ewes were euthanized and a hysterectomy was performed to acquire the fetus(es). Lambs were collected within 24 h of birth from ewes allowed to undergo parturition (n = 10 to 15 fetuses or lambs from five to seven ewes per diet and day of gestation combination).

<sup>3</sup> LSM means are reported.

<sup>4</sup> Adrenal gland weight is reported for the sum of the weight of pair of adrenal glands.

<sup>5</sup> nd = not detectable

<sup>6</sup> Kidney weight is reported for the sum of weight of pair of kidneys.

<sup>7</sup> Perirenal fat weight is reported for the sum of weight of fat collected from around both kidneys.
